# 1 TITLE

2 Origin and Evolution of a Pandemic Lineage of the Kiwifruit Pathogen *Pseudomonas*  
3 *syringae* pv. *actinidiae*

# 5 AUTHORS

6 Honour C. McCann<sup>a,c,1,3</sup>, Li Li<sup>b,1</sup>, Yifei Liu<sup>c</sup>, Dawei Li<sup>b</sup>, Pan Hui<sup>b</sup>, Canhong Zhong<sup>b</sup>,  
7 Erik Rikkerink<sup>d</sup>, Matthew Templeton<sup>d,e</sup>, Christina Straub<sup>a</sup>, Elena Colombi<sup>a</sup>, Paul B.  
8 Rainey<sup>a,f,g,2</sup> & Hongwen Huang<sup>b,c,2,3</sup>

# 10 AFFILIATIONS

11 <sup>a</sup> New Zealand Institute for Advanced Study, Massey University, Private Bag  
12 102904, Auckland 0745, New Zealand,.

13 <sup>b</sup> Key Laboratory of Plant Germplasm Enhancement and Specialty Agriculture,  
14 Wuhan Botanical Garden, Chinese Academy of Sciences, Wuhan 430074, China

15 <sup>c</sup> Key Laboratory of Plant Resources Conservation and Sustainable Utilization, South  
16 China Botanical Garden, Chinese Academy of Sciences, Guangzhou 510650, China

17 <sup>d</sup> New Zealand Institute for Plant and Food Research, 120 Mt Albert Road, Auckland  
18 1025, New Zealand

19 <sup>e</sup> School of Biological Sciences, University of Auckland, Private Bag 92-019,  
20 Auckland 1142, New Zealand

21 <sup>f</sup> Max Planck Institute for Evolutionary Biology, August-Thienemann-Str. 2, Plön  
22 24306, Germany

23 <sup>g</sup> Ecole Supérieure de Physique et de Chimie Industrielles de la Ville de Paris (ESPCI

ParisTech), CNRS UMR 8231, PSL Research University, 75231 Paris Cedex 05,  
France

<sup>1</sup> Co-first authors

<sup>2</sup> Co-senior authors

<sup>3</sup> Corresponding authors: h.mccann@massey.ac.nz, tel.: +64 94140800;

huanghw@scbg.ac.cn, tel.: +86 020 37252778.

## ABSTRACT

Recurring epidemics of kiwifruit (*Actinidia* spp.) bleeding canker disease are caused by *Pseudomonas syringae* pv. *actinidiae* (*Psa*), whose emergence coincided with domestication of its host. The most recent pandemic has had a deleterious effect on kiwifruit production worldwide. In order to strengthen understanding of population structure, phylogeography and evolutionary dynamics of *Psa*, we sampled 746 *Pseudomonas* isolates from cultivated and wild kiwifruit across six provinces in China, of which 87 were *Psa*. Of 234 *Pseudomonas* isolated from wild *Actinidia* spp. none were identified as *Psa*. Genome sequencing of fifty isolates and the inclusion of an additional thirty from previous studies show that China is the origin of the recently emerged pandemic lineage. However China harbours only a fraction of global *Psa* diversity, with greatest diversity found in Korea and Japan. Distinct transmission events were responsible for introduction of the pandemic lineage of *Psa* into New Zealand, Chile and Europe. Two independent transmission events occurred between China and Korea, and two Japanese isolates from 2014 cluster with New Zealand *Psa*. Despite high similarity at the level of the core genome and negligible impact of

within-lineage recombination, there has been substantial gene gain and loss even within the single clade from which the global pandemic arose.

## SIGNIFICANCE STATEMENT

Bleeding canker disease of kiwifruit caused by *Pseudomonas syringae* pv. *actinidiae* (*Psa*) has come to prominence in the last three decades. Emergence has coincided with domestication of the host plant and provides a rare opportunity to understand ecological and genetic factors affecting the evolutionary origins of *Psa*. Here, based on genomic analysis of an extensive set of strains sampled from China and augmented by isolates from a global sample, we show, contrary to earlier predictions, that China is not the native home of the pathogen, but is nonetheless the source of the recent global pandemic. Our data identify specific transmission events, substantial genetic diversity and point to non-agricultural plants in either Japan or Korea as home to the source population.

# INTRODUCTION

A pandemic of kiwifruit (*Actinidia* spp.) bleeding canker disease caused by *Pseudomonas syringae* pv. *actinidiae* (*Psa*) emerged in 2008 with severe consequences for production in Europe, Asia, New Zealand and Chile (1-7). Earlier disease epidemics in China, South Korea and Japan had a regional impact, however, as infections were often lethal and the pathogen rapidly disseminated, it was predicted to pose a major threat to global kiwifruit production (8, 9). Despite recognition of this threat – one subsequently realized in 2008 – little was done to advance understanding of population structure, particularly across regions of eastern Asia that mark the native home of the genus *Actinidia*.

The origins of agricultural diseases and their link with plant domestication is shrouded by time, as most plant domestication events occurred millennia ago. Kiwifruit (*Actinidia* spp.) is a rare exception because domestication occurred during the last century (10, 11). Kiwifruit production and trade in plant material for commercial and breeding purposes has recently increased in Asia, Europe, New Zealand and Chile (12-16), preceding the emergence of disease in some cases by less than a decade.

The first reports of a destructive bacterial canker disease in green-fleshed kiwifruit (*A. chinensis* var. *deliciosa*) came from Shizuoka, Japan (17, 18). The causal agent was described as *Pseudomonas syringae* pv. *actinidiae* (*Psa*) (18). An outbreak of disease with symptoms similar to those produced by *Psa* was reported to have occurred in 1983-1984 in Hunan, China, though no positive identification was made or isolates stored at that time (17). *Psa* was also isolated from infected green kiwifruit in Korea shortly thereafter (19). The cultivation of more recently developed gold-fruited cultivars derived from *A. chinensis* var. *chinensis* (e.g. ‘Hort16A’) began only

in the 2000s and an outbreak of global proportions soon followed. The first published notices of the latest outbreak on gold kiwifruit issued from Italy in 2008, with reports from neighbouring European countries, New Zealand, Asia and Chile occurring soon after (1-6, 20). Whole genome sequencing showed the most recent global outbreak of disease was caused by a new lineage of *Psa* (previously referred to as *Psa*-V and now referred to as *Psa*-3), while earlier disease incidents in Japan and Korea were caused by strains forming separate clades referred to *Psa*-1 (previously *Psa*-J) and *Psa*-2 (previously *Psa*-K), respectively (21-24). These clades are marked by substantial variation in their complement of type III secreted effectors, which are required for virulence in *P. syringae*. Despite the surprising level of within-pathovar differences in virulence gene repertoires occurring subsequent to the divergence of these three clades, strains from each clade are capable of infecting and growing to high levels in both *A. chinensis* var. *deliciosa* and *A. chinensis* var. *chinensis* (23).

The severity of the latest global outbreak is largely predicated on the expansion in cultivation of clonally propagated highly susceptible *A. chinensis* var. *chinensis* cultivars, with trade in plant material and pollen likely providing opportunities for transmission between distant geographic regions. Identifying the source from which *Psa* emerged to cause separate outbreaks remains an important question. Intriguingly, despite the divergence in both the core and flexible genome, these distinct clades nevertheless exhibit evidence of recombination with each other and unknown donors (23). This suggests each lineage of *Psa* emerged from a recombining source population. Definitive evidence for the location, extent of diversity and evolutionary processes operating within this population remain elusive. Early reports suggested China may be the source of the latest global outbreak (22, 23). Although the strains of *Psa* available at that time did not provide unambiguous

and well-supported evidence of a Chinese origin, this speculation was based on the fact that kiwifruit are native to China; it is the provenance of the plant material selected for commercial and breeding purposes in China, New Zealand, Italy and other kiwifruit growing regions; there is extensive trade in plant material between all of these regions; and one Chinese isolate was found to carry an integrative and conjugative element (ICE) that was also found in New Zealand *Psa*-3 isolates (22).

In order to strengthen understanding of the population structure, phylogeography and evolutionary dynamics of *Psa*, we isolated *Psa* from cultivated kiwifruit across six provinces in China and obtained additional isolates from South Korea and Japan. Genome sequencing of fifty isolates and the inclusion of an additional thirty previously sequenced isolates show that while China is the origin of the pandemic lineage of *Psa*, only a single clade is currently present in China, while strains from multiple clades are present in both Korea and Japan. Strains from the pandemic lineage are closely related and display reduced pairwise nucleotide diversity relative to other lineages, indicating a more recent origin. Distinct transmission events were responsible for the introduction of the pandemic lineage of *Psa* into New Zealand, Chile and Europe. Two independent transmission events occurred between China and Korea, and two Japanese isolates from 2014 cluster with New Zealand *Psa*. Despite high similarity at the level of the core genome and negligible impact of within-lineage recombination, there has been substantial gene gain and loss even within the single clade from which the global pandemic arose.

## RESULTS

### The phylogeography of *Psa*

The genomes of 50 *P. syringae* pv. *actinidiae* (*Psa*) isolated from symptomatic kiwifruit in China, Korea and New Zealand between 2010 and 2015 were sequenced (Table S1). Combined with 30 *Psa* genomes from earlier outbreaks and different geographic regions (e.g. Italy and Chile), our samples represent the main *Psa* genotypes from the countries producing 90% of kiwifruit production worldwide. The completed reference genome of *Psa* NZ13 (ICMP 18884) comprises a 6,580,291bp chromosome and 74,423bp plasmid (23, 25). Read mapping and variant calling with reference to *Psa* NZ13 chromosome produced a 1,059,722bp non-recombinant core genome for all 80 genomes, including 2,953 nonrecombinant SNPs. A maximum likelihood phylogenetic analysis showed the four clades of *Psa* known to cause bleeding canker disease in kiwifruit were represented among the 80 strains (Figure 1). The first clade (*Psa*-1) includes the pathotype strain of *Psa* isolated and described during the first recorded epidemic of bleeding canker disease in Japan (1984-1988). The second clade (*Psa*-2) includes isolates from an epidemic in South Korea (1997-1998), and the third clade (*Psa*-3) includes isolates that define the global pandemic lineage (2008-present). A fourth clade (*Psa*-5) is represented by a single strain, as no additional sequences or isolates were available (26). The average between and within-clade pairwise identity is 98.93% and 99.73%, respectively (Table S2). All *Psa* isolated from kiwifruit across six different provinces in China group are members of the same clade: *Psa*-3. A subset of Chinese strains group with the *Psa* isolated during the global outbreak in Italy, Portugal, New Zealand, and Chile. This subset is referred to as the pandemic lineage of *Psa*-3.

In order to obtain greater resolution of the relationships between the new Chinese and pandemic isolates, we identified the 4,853,413bp core genome of all 62 strains in *Psa*-3. The core genome includes both variant and invariant sites and excludes regions either unique to or deleted from one or more strains. To minimize the possibility of recombination affecting the reconstruction of evolutionary relationships and genetic distance within *Psa*-3, ClonalFrameML was employed to identify and remove 258 SNPs with a high probability of being introduced by recombination rather than mutation, retaining 1,948 nonrecombinant SNPs. The within-lineage ratio of recombination to mutation (R/theta) is reduced in *Psa*-3 ( $6.75 \times 10^{-2} \pm 3.24 \times 10^{-5}$ ) relative to between lineage rates ( $1.27 \pm 5.16 \times 10^{-4}$ ), and the mean divergence of imported DNA within *Psa*-3 is  $8.54 \times 10^{-3} \pm 5.18 \times 10^{-7}$  compared to  $5.68 \times 10^{-3} \pm 1.04 \times 10^{-8}$  between lineages. Although recombination has occurred within *Psa*-3, it is less frequent and has introduced fewer polymorphisms relative to mutation: when accounting for polymorphisms present in recombinant regions identified by ClonalFrameML and/or present on transposons, plasmids, and other mobile elements, more than seven-fold more polymorphisms were introduced by mutation relative to recombination (Table 1). Recombination has a more pronounced impact between clades, where substitutions are slightly more likely to have been introduced by recombination than by mutation (Table 1).

## **The source of pandemic *Psa***

Data show that there is greater diversity among the Chinese *Psa*-3 population than had been previously identified (Figure 2). Interestingly, clades defining *Psa*-1 and *Psa*-3 exhibit similar levels of diversity (Table S2). These clades share a common ancestor: assuming they are evolving at a similar rate, they may have been present in



185 Japan and China for a similar duration. The strains isolated during the latest pandemic  
186 in Italy (I2, I3, I10, I11, I13), Portugal (P1), New Zealand (NZ13, NZ31-35, NZ37-  
187 43, NZ45-49, NZ54), Chile (CL4), Japan (J38, J39) and Korea (K5) during the latest  
188 kiwifruit canker pandemic cluster with nine Chinese isolates (C1, C3, C29-31, C62,  
189 C67-69) (Figure 2). This pandemic lineage exhibits little diversity at the level of the  
190 core genome, having undergone clonal expansion only very recently. The NZ isolates  
191 form a monophyletic group and share a common ancestor, indicating there was a  
192 single transmission event of *Psa* into NZ. Two recently isolated Japanese pandemic  
193 *Psa*-3 isolated in 2014 group within the New Zealand isolates, suggesting the  
194 pandemic lineage may have been introduced into Japan via New Zealand (Figure 2).  
195 Italian and Portuguese pandemic strains also form a separate group, indicative of a  
196 single transmission event from China to Italy. China is undoubtedly the source of the  
197 strains responsible for the pandemic of kiwifruit canker disease, yet the precise  
198 origins of the pandemic subclade remain unclear. Isolates from four different  
199 provinces in Western China (Guizhou, Shaanxi, Sichuan and Chongqing) are  
200 represented among the pandemic lineage, indicating extensive regional transmission  
201 within China after emergence of the pandemic. Yet each province harbouring  
202 pandemic isolates also harbors basally diverging *Psa*-3 isolates (Figure 3). With the  
203 exception of a group of isolates from Sichuan, there is no phylogeographic signal  
204 among the more divergent Chinese strains. This suggests there was extensive regional  
205 transmission of *Psa* both prior and subsequent to the emergence of the pandemic  
206 subclade in China. Korea harbors both divergent and pandemic subclade *Psa*-3  
207 strains. K5 groups with the Chilean *Psa*-3 strain in the pandemic subclade, while K7  
208 groups with the more divergent Chinese isolates indicating that a transmission event  
209 from strains outside the pandemic subclade may have occurred. This pool of diversity

therefore represents a reservoir from which novel strains are likely to emerge in the future.

The reduced level of diversity within the core genome of pandemic *Psa*-3 demonstrates these strains have been circulating for a shorter period of time relative to those responsible for earlier outbreaks in both Japan and Korea. In order to estimate the divergence time of the pandemic lineages as well as the age of the most recent common ancestor of all *Psa* clades displaying vascular pathogenicity on kiwifruit, we performed linear regression of root-to-tip distances against sampling dates using the RAxML phylogenies determined from the non-recombinant core genome of all clades and of *Psa*-3 alone. No temporal signal was identified in the data. There were poor correlations between substitution accumulation and sampling dates, indicating the sampling period may have been too short for sufficient substitutions to occur. There may also be variation in the substitution rate within even a single lineage. Forty-four unique non-recombinant SNPs were identified among the 21 pandemic *Psa*-3 genomes sampled over five years in New Zealand (an average of 2.10 per genome over five years) producing an estimated rate of  $8.7 \times 10^{-8}$  substitutions per site per year. The relatively slow substitution rate and the strong bottleneck effect experienced during infections hinders efforts to reconstruct patterns of transmission, as the global dissemination of a pandemic strain may occur extremely rapidly (27, 28). The estimated divergence time of *Psa* broadly considered is likely older than the pandemic and epidemic events with which they are associated: the earliest report of disease cause by lineage 1 occurred in 1984 and the first report of infection from the latest pandemic was issued in 2008.

## Diversification and parallelism among *Psa-3* isolates

2,206 SNPs mapping to the core genome of *Psa-3* were identified; 258 of these mapped to recombinant regions identified by ClonalFrameML and/or plasmid, prophage, integrative and conjugative elements, transposons and other mobile genetic elements (Table 1, Figure 4). The highest density of polymorphism occurs in and around the integrative and conjugative element (ICE) in *Psa* NZ13 (Figure 4). Of the 1,948 SNPs mapping to the non-recombinant non-mobile core genome, 58.1% (1,132) are strain specific. Most strain-specific SNPs are found in the two most divergent members of the lineage: *Psa* C16 and C17, with 736 and 157 strain-specific SNPs, respectively. The remaining isolates have an average of 4.0 strain-specific SNPs, ranging from 0 to 44 SNPs per strains. There are 816 SNPs shared between two or more *Psa-3* strains. The pandemic clade differs from the more divergent Chinese strains by 72 shared SNPs. Within the pandemic lineage there are 125 strain-specific SNPs, an average of 3.1 unique SNPs per strain (ranging from 0-27 SNPs) and an additional 29 SNPs shared among pandemic strains. Protein-coding sequence accounts for 88.4% of the non-recombinant, gap-free core genome of this clade. We observed that 78.9% (1,536/1,948) of mutations occurred in protein coding sequence, significantly different from the expectation (1,722/1,948) in the absence of selection (Pearson's  $\chi^2$  test:  $P < 0.0001$ ,  $\chi^2 = 173.46$ ). This suggests there is selection against mutations occurring in protein coding sequences. Of the 953 substitutions introduced by mutation in *Psa-3*, 927 resulted in amino acid substitutions, two resulted in extensions and 24 resulted in premature truncations.

Multiple synonymous and non-synonymous mutations were identified in 269 genes. The accumulation of multiple independent mutations in the same gene may be a function of gene length, mutational hotspots or directional selection—A range of

hypothetical proteins, membrane proteins, transporters, porins and type III and IV secretion system proteins acquired between two and seven mutations. The fitness impact of these mutations – and the 38 amino-acid changing mutations in the ancestor of the pandemic subclade – is unknown, yet it is possible these patterns are the outcome of selective pressures imposed during bacterial residence within a similar host niche.

Two substitutions are shared exclusively by the European pandemic strains (AKT28710.1 G1150A and AKT33438.1 T651C) and one silent substitution in a gene encoding an acyltransferase superfamily protein (AKT31915.1 C273T) is shared among the European pandemic and six of nine Chinese pandemic strains (C3, C29-31, C67, C69). As these six Chinese pandemic strains were isolated from Shaanxi, Sichuan and Chongqing, they do not provide any insight into the precise geographic origins of the European pandemic *Psa*-3, though transmission from China to Italy is likely concomitant with dissemination of the pandemic lineage across China. Six conserved and diagnostic polymorphisms are present in the pandemic New Zealand and Japanese isolates (Table S3). One of these is a silent substitution in an ion channel protein (AKT31947.1 A213G), another is an intergenic (T->G) mutation at position 362,522 of the reference *Psa* NZ13 chromosome and the remaining four are nonsynonymous substitutions in an adenylyltransferase (AKT32845.1, W977R); chromosome segregation protein (AKT30494.1, H694Q); cytidylate kinase (AKT29651.1, V173L) and peptidase protein (AKT32264.1, M418K).

The type III secretion system is known to be required for virulence in *P. syringae*. A 44,620bp deletion event in *Psa* C17 resulted in the loss of 42 genes encoding the structural apparatus and conserved type III secreted effectors in *Psa* C17. This strain is highly compromised in its ability to grow in *A. chinensis* var.

*deliciosa* ‘Hayward’, attaining  $1.2 \times 10^7$  cfu/g three days post inoculation (dpi) and declining to  $8.8 \times 10^4$  cfu/g at fourteen dpi (Figure S1). This is a marked reduction compared to *Psa* NZ13, which attains  $3.0 \times 10^9$  and  $4.2 \times 10^7$  cfu/g three and fourteen dpi, respectively. *Psa* C17 nevertheless multiplies between day 0 and day 3, indicating that even in the absence of type III-mediated host defense disruption, *Psa* may still proliferate in host tissues. The loss of the TTSS does not inhibit the growth of *Psa* C17 as strongly in the more susceptible *A. chinensis* var. *chinensis* ‘Hort16A’ cultivar.

Two potentially significant deletion events occurred in the ancestor of the pandemic subclade: a frameshift caused by a mutation and single base pair deletion in a glucan succinyltransferase (*opgC*) and a 6,456bp deletion in the *wss* operon (Figure S2). Osmoregulated periplasmic glucans (OPGs, in particular *opgG* and *opgH*) are required for motility, biofilm formation and virulence in various plant pathogenic bacteria and fungi (29-31). Homologs of *opgGH* remain intact in the pandemic subclade, yet the premature stop mutation in *opgC* likely results in the loss of glucan succinylation. The soft-rot pathogen *Dickeya dadantii* expresses OpgC in high osmolarity conditions, resulting in the substitution of OPGs by O-succinyl residues (32). *D. dadantii* *opgC* deletion mutants did not display any reduction in virulence (32). *Psa* is likely to encounter high osmolarity during growth and transport in xylem conductive tissues, yet the impact of the loss of *opgC* on *Psa* fitness has yet to be determined. The most striking difference between the pandemic subclade and more divergent Chinese *Psa*-3 strains is the deletion of multiple genes involved in cellulose production and acetylation of the polymer (Figure S2) (33). The loss of cellulose production and biofilm production is not associated with a reduction in growth or symptom development of *P. syringae* pv. *tomato* DC3000 on tomato, but may

enhance bacterial spread through xylem tissues during vascular infections (34). In *P. fluorescens* SBW25 deletion of the Wss operon significantly compromises ability to colonise plant surfaces and in particular the phyllosphere of sugar beet (*Beta vulgaris*) seedlings (35). It is possible that loss of this locus aids movement through the vascular system and / or dissemination between plants, by limiting capacity for surface colonization and biofilm formation.

### **Dynamic genome evolution of *Psa-3***

Despite the high similarity within the core genome, extensive variation is evident in the pangenome of *Psa-3* (Figure 5). The core genome (4,339 genes in 99-100% of strains, and 674 genes in 95%-99% of strains, or 58-62 genomes) comprises 50.5% of the total pangenome (9,931 genes). 968 genes are present in 15-95% of strains (9-57 genomes), the so-called ‘shell genes’ (Figure 5). The flexible genome is comprised of the ‘shell’ and ‘cloud’ genes; the latter describes genes present in 0-15% of strains (one to six genomes in this case). Cloud genes contribute most to the flexible genome: 3,950 genes are present in one to six strains. This is a striking amount of variation in a pathogen described as clonal and monomorphic. It should be noted that sequencing and assembly quality will impact annotation and pangenome estimates: omitting the low quality J39 assembly results in a core and soft-core genome differing by 18 genes and a reduction of the cloud by 275. Despite a relatively slow rate of mutation and limited within-clade homologous recombination, the amount of heterologous recombination demonstrates that the genomes of these pathogens are highly labile. Mobile genetic elements like bacteriophage, transposons and integrases make a dramatic contribution to the flexible genome. Integrative and conjugative elements (ICEs) are highly mobile elements and have recently been

demonstrated to be involved in the transfer of copper resistance in *Psa* (36).  
 Prodigious capacity for lateral gene transfer creates extreme discordance between ICE  
 type, host phylogeny and host geography making these regions unsuitable markers of  
 host evolution and origin.

Three divergent ICEs have been previously described from the global  
 pandemic lineage (23). Within *Psa*-3 ICEs were found in 53 of 62 isolates (nine of the  
 divergent Chinese isolates were devoid of any such element) (Figure 2). No  
 phylogeographic signal is evident. For example, strains from Sichuan, Shaanxi,  
 Korea, Italy and Portugal share an identical ICE. Even within a single Chinese  
 province, multiple ICEs exist (Shaanxi and Sichuan isolates harbour four and three  
 different ICEs, respectively). Moreover, ICE host range is not limited to *Psa* alone:  
 the ICE found in every NZ isolate (and also recorded in Chinese isolate C1) exists in  
 essentially identical form in a strain of *P. syringae* pv. *avellanae* CRAPAV013  
 isolated from hazelnut in 1991 in Latina, Italy (it exhibits 98% pairwise identity,  
 differing from the New Zealand ICE by a transposon, 66bp deletion and a mere 6  
 SNPs).

## 350 DISCUSSION

351 We have described an endemic population of *Psa* infecting cultivated kiwifruit  
 352 in China. All *Psa* isolated within China are members of the same lineage as that  
 353 responsible for the latest pandemic. The pandemic strains isolated in Italy, Portugal,  
 354 Chile and New Zealand form a subclade within this lineage along with a subset of  
 355 Chinese isolates, indicating that the pandemic ultimately emerged from the Chinese  
 356 population of lineage 3 strains. Italian pandemic strains share a SNP with six of nine  
 357 Chinese pandemic *Psa* strains, indicating there was likely a direct transmission event  
 358 from China to Italy prior to 2008. The New Zealand isolates share six clade-defining  
 359 mutations, indicating that a separate and single transmission event was responsible for  
 360 the outbreak of disease there. Identification of the transmission pathway introducing  
 361 *Psa* into New Zealand is dependent on obtaining a sample of *Psa* sharing some or all  
 362 of the mutations characteristic of NZ *Psa* from either the overseas source population  
 363 or from infected plant material arriving into New Zealand from an overseas location.  
 364 The relatively low mutation rate in the core genome of *Psa* places a lower boundary  
 365 on the ability of genomic epidemiology to resolve transmission events occurring  
 366 either rapidly (as a consequence of human-mediated long-distance dissemination) or  
 367 at a local scale. The Japanese pandemic strains cluster with the NZ strains, and share  
 368 all six clade-defining mutations. This suggests that pandemic *Psa*-3 was either  
 369 introduced into Japan via New Zealand, or from the same as-yet unknown region in  
 370 China from which transmission to New Zealand occurred. *Psa*-3 was first identified  
 371 as causing disease in four prefectures across Japan in April 2014 (5). Japan imported  
 372 pollen and plant material from both China and New Zealand prior and subsequent to  
 373 *Psa*-3 detection in both those countries, though the amount of pollen imported from



New Zealand in 2012 (349 kg) and 2013 (190 kg) far outweighed the amount imported from China (1 kg in both 2012 and 2013) (37).

Our phylogeographic study of a single lineage giving rise to a pandemic in *P. syringae* has revealed far greater diversity than was previously appreciated. Extensive diversity between *Psa* isolates collected from *Actinidia* spp. was observed in the same province. The amount of diversity present within lineage 3 indicates this population was present and circulating in China before the pandemic began. The emergence of the pandemic subclade moreover has not resulted in the displacement of more ancestral strains: both pandemic and divergent lineage 3 *Psa* were isolated from four out of six provinces.

Strains from three different clades have been isolated in both Korea and Japan, while China harbours strains from only a single clade. The most basal clades of canker-causing *Psa* are comprised of Korean strains isolated between 1997 and 2014 (*Psa*-2) and a member of the recently identified lineage *Psa*-5. One early isolate (*Psa* K3, 1997) groups with the Japanese isolates in lineage 1, and a more recent Korean isolate *Psa* K7 (2014) groups with the more diverse Chinese isolates in *Psa*-3. Korea therefore harbours a more diverse population of *Psa* than China, with strains from three distinct lineages of *Psa* (1, 2 and non-pandemic subclade 3). The novel group of *Psa* recently identified in Japan (*Psa*-5) appears to share an ancestor with the Korean *Psa*-2 strains. With the recent dissemination of pandemic *Psa*-3 and the historical presence of *Psa*-1 in Japan, the Japanese population of *Psa* is comprised of three distinct clades of *Psa* (1, 5 and pandemic *Psa*-3). Though no strains from *Psa*-1 have been isolated in either Japan or Korea since 1997, at least two lineages currently coexist in both Japan and Korea. This strongly suggests that the source population of all *Psa* is not China, but likely resides in either Korea or Japan. The potential

transmission of a non-pandemic *Psa*-3 strain from China to Korea and the identification of a new clade in Japan supports our earlier assertion that variants will continue to emerge to cause local epidemics and global pandemics in the future (23).

Considering that the divergence time of this monophyletic pathovar predates the commercialisation of kiwifruit by hundreds if not thousands of years, *Psa* is likely associated with a non-domesticated host(s) in the wild. Both *A. chinensis* var. *deliciosa* or *A. chinensis* var. *chinensis* are found in natural ecosystems and have overlapping habitat ranges with cultivated kiwifruit in many areas. However, despite isolating 746 *Pseudomonas* strains from both wild and cultivated kiwifruit during this sampling program, we did not identify *Psa* among any of the 188 *Pseudomonas* spp. isolated from 98 wild *A. chinensis* var. *deliciosa* or *A. chinensis* var. *chinensis* sampled across China (Table S4). Very few *Actinidia* spp. have ranges extending to South Korea and Japan: *A. arguta*, *A. kolomikta*, *A. polygama* and *A. rufa*. *A. arguta* are broadly distributed across both Korea and Japan. Early work by Ushiyama *et al.* (1992) found that *Psa* could be isolated from symptomatic *A. arguta* plants in Japan. The possibility that this wild relative of kiwifruit harbours diverse strains of *Psa* that may emerge to cause future outbreaks is currently under investigation. Alternately, a host shift from another domesticated crop may have occurred after expansion in kiwifruit cultivation.

Numerous epidemiological studies of human pathogens have demonstrated environmental or zoonotic origins, but there are few such studies of plant pathogens (23, 38-48). Where ecological and genetic factors restrict pathogens to a small number of plant hosts some progress has been made, but for facultative pathogens such as *P. syringae* that colonise multiple hosts and are widely distributed among

423 both plant and non-plant habitats, the environmental reservoirs of disease and factors  
 424 affecting their evolutionary emergence are difficult to unravel (49, 50).

425       The emergence of *Psa* over the last three decades – concomitant with  
 426 domestication of kiwifruit– offers a rare opportunity to understand the relationship  
 427 between wild populations of both plants and microbes and the ecological and  
 428 evolutionary factors driving the origins of disease, including the role of agriculture. It  
 429 is now possible to exclude China as the native home to the source population, but the  
 430 precise location remains unclear. Nonetheless, it is likely, given the extent of diversity  
 431 among *Psa* isolates and the time-line to domestication, that ancestral populations exist  
 432 in non-agricultural plant communities. Attention now turns to Korea and Japan and in  
 433 particular the interplay between genetic and ecological factors that have shaped *Psa*  
 434 evolution.

435

## MATERIALS AND METHODS

### Bacterial strains and sequencing

Samples were procured by isolation from symptomatic plant tissue. Bacterial strain isolations were performed from same-day sampled leaf and stem tissue by homogenising leaf or stem tissue in 800uL 10mM MgSO<sub>4</sub> and plating the homogenate on *Pseudomonas* selective media (King's B supplemented with cetrimide, fucidin and cephalosporin, Oxoid). Plates were incubated 48 hours between 25 and 30°C. Single colonies were restreaked and tested for oxidase activity, and used to inoculate liquid overnight cultures in KB. Strains were then stored at -80°C in 15% glycerol and the remainder of the liquid culture was reserved for genomic DNA isolation by freezing the pelleted bacterial cells at -20°C. Genomic DNA extractions were performed using Promega Wizard 96-well genomic DNA purification system.

Initial strain identification was performed by sequencing the citrate synthase gene (*cts*, aka *gltA* (51)). Subsequent to strain identification, paired-end sequencing was performed using the Illumina HiSeq 2500 platform (Novogene, Guangzhou, China). Additional paired-end sequencing was performed at New Zealand Genomics Limited (Auckland, New Zealand) using the MiSeq platform, and raw sequence reads from some previously published isolates were shared by Mazzaglia *et al.* (24).

### Variant Calling and Recombination Analyses

The completely sequenced genome of *Pseudomonas syringae* pv. *actinidiae* NZ13 was used as a reference for variant calling. A near complete version of this genome was used as a reference in our previous publication and subsequently finished

by Templeton *et al.* (2015), where it is referred to as ICMP18884 (23, 25). Variant calling was performed on all *P. syringae* pv. *actinidiae* isolates for which read data was available.

Read data was corrected using the SPADEs correction module and Illumina adapter sequences were removed with Trimmomatic allowing 2 seed mismatches, with a palindrome and simple clip threshold of 30 and 10, respectively (52, 53). Quality-based trimming was also performed using a sliding window approach to clip the first 10 bases of each read as well as leading and trailing bases with quality scores under 20, filtering out all reads with a length under 50 (53). PhiX and other common sequence contaminants were filtered out using the Univec Database and duplicate reads were removed (54).

Reads were mapped to the complete reference genome *Psa* NZ13 with Bowtie2 and duplicates removed with SAM Tools (55, 56). Freebayes was used to call variants with a minimum base quality 20 and minimum mapping quality 30 (57). Variants were retained if they had a minimum alternate allele count of 10 reads and fraction of 95% of reads supporting the alternate call. The average coverage was calculated with SAM Tools and used as a guide to exclude overrepresented SNPs (defined here as threefold higher coverage than the average) which may be caused by mapping to repetitive regions. BCFtools filtering and masking was used to generate final reference alignments including SNPs falling within the quality and coverage thresholds described above and excluding SNPs within 3bp of an insertion or deletion (indel) event or indels separated by 2 or fewer base pairs. Invariant sites with a minimum coverage of 10 reads were also retained in the alignment, areas of low (less than 10 reads) or no coverage are represented as gaps relative to the reference.

Freebayes variant calling includes indels and multiple nucleotide insertions as well as single nucleotide insertions, however only SNPs were retained for downstream phylogenetic analyses. An implementation of ClonalFrame suitable for use with whole genomes was employed to identify recombinant regions using a maximum likelihood starting tree generated by RaxML (58, 59). All substitutions occurring within regions identified as being introduced due to recombination by ClonalFrameML were removed from the alignments. The reference alignments were manually curated to exclude substitutions in positions mapping to mobile elements such as plasmids, integrative and conjugative elements and transposons.

## Phylogenetic Analysis

The maximum likelihood phylogenetic tree of 80 *Psa* strains comprising new Chinese isolates and strains reflecting the diversity of all known lineages was built with RAxML (version 7.2.8) using a 1,062,844bp core genome alignment excluding all positions for which one or more genomes lacked coverage of 10 reads or higher (59). Removal of 3,122 recombinant positions produced a 1,059,722bp core genome alignment including 2,953 variant sites. Membership within each phylogenetic clade corresponds to a minimum average nucleotide identity of 99.70%. The average nucleotide identity was determined using a BLAST-based approach in JspeciesWS (ANiB), using a subset of 32 *Psa* genome assemblies spanning all clades (60). In order to fully resolve the relationships between more closely related recent outbreak strains, a phylogeny was constructed using only the 62 *Psa*-3 strains. This was determined using a 4,853,155bp core genome alignment (excluding 258 recombinant SNPs), comprising invariant sites and 1,948 non-recombinant SNPs and invariant sites. Trees were built with the generalized time-reversible model and gamma

distribution of site-specific rate variation (GTR+ $\Gamma$ ) and 100 bootstrap replicates. *Psa*  
C16 was used to root the tree as this was shown to be the most divergent member of  
the phylogeny when including strains from multiple lineages. Nodes shown have  
minimum bootstrap support values of 50.

## Identification of the core and mobile genome

Genomes were assembled with SPAdes using the filtered, trimmed and  
corrected reads (52). Assembly quality was improved with Pilon and annotated with  
Prokka (61, 62). The pangenome of *Psa*-3 was calculated using the ROARY pipeline  
(63). Orthologs present in 61 (out of a total of 62) genomes were considered core;  
presence in 58-60, 9-57 and 1-8 were considered soft-core, shell and cloud genomes,  
respectively. BLAST-based confirmation was used to confirm the identity predicted  
virulence or pandemic-clade-restricted genes in genome assemblies.

## Pathogenicity assays

Growth assays were performed using both stab inoculation as in McCann *et al.*  
(2013) an initial inoculum of  $10^8$ cfu/mL and four replicate plants at day 0 and six at  
all subsequent sampling time points. Bacterial density in inoculated tissue was  
assessed by serial dilution plating of homogenized tissue. Statistical significance  
between each treatment at each time point was assessed using two-tailed t-tests with  
uneven variance.

## ACKNOWLEDGEMENTS

We gratefully acknowledge the assistance of the following guides, teachers, and graduate assistants who helped us identify sample locations in China: Junjie Gong, Yancang Wang, Shengju Zhang, Zupeng Wang, Yangtao Guo, Meiyan Chen, Kuntong Li, Moucai Wang, Jiaming He, Yonglin Zhao, Zhongshu Yu, Yan Lv, Mingfei Yao, Shihua Pu, Tingwen Huang, Qiuling Hu, Caizhi He, and Jiaqing Peng. Derk Wachsmuth at Max Planck Institute for computing server support. James Connell for assistance with biosecurity regulations. Members of the Rainey and Huang labs for discussion. Joel Vanneste for contributing strains. This work was funded by grants from the New Zealand Ministry for Business, Innovation and Employment (C11X1205), Canada Natural Sciences and Engineering Research Council (NSERC PDF), Chinese Academy of Sciences President's International Fellowship Initiative (Grant NO. 2015PB063), China Scholarship Council (Grant NO. 201504910013), National Natural Science Foundation of China (Grant NO. 31572092), Science and Technology Service Network Initiative Foundation of The Chinese Academy of Sciences (Grant NO. KFJ-EW-STS-076), Protection and utilization of Crop Germplasm Resources Foundation of Ministry of Agriculture (Grant NO. 2015NWB027).



## 550 TABLES

551 **Table 1. Origin of SNPs in core genomes**

552

|                       |               | Intergenic | Synon | Nonsyn | Extension | Trunc | Total              |      |
|-----------------------|---------------|------------|-------|--------|-----------|-------|--------------------|------|
| <i>Psa-3</i>          | Mutation      | 412        | 583   | 927    | 2         | 24    | 1,948              |      |
|                       | Recombination | 35         | 136   | 85     | 1         | 1     | 258                | 7.55 |
| <b>All <i>Psa</i></b> | Mutation      | 457        | 1,493 | 982    | 3         | 18    | 2,953              |      |
|                       | Recombination | 355        | 2,212 | 558    | 2         | 5     | 3,132 <sup>1</sup> | 0.94 |

553 <sup>1</sup>For ten positions in the alignment, two recombination events were predicted to occur

554 **Table S1. Strains**  
555

| ID              | WGS origin                     | Host plant                     | Country                             | Year | Other collection/alias | Contigs | N50    |
|-----------------|--------------------------------|--------------------------------|-------------------------------------|------|------------------------|---------|--------|
| C1 <sup>1</sup> | Mazzaglia <i>et al.</i> (2012) | <i>A. chinensis</i> 'Hongyang' | China, Shaanxi, Wei                 | 2010 | CH2010-6, M7           | 470     | 24,560 |
| C3              | This paper                     | <i>A. deliciosa</i> 'Hayward'  | China, Shaanxi, Xi'an, Zhouzhi      | 2012 | ZY2, CC770             | 318     | 46,356 |
| C9 <sup>1</sup> | Butler <i>et al.</i> (2013)    |                                | China, Shaanxi, Wei County          | 2010 | M228                   | 346     | 38,960 |
| C10             | This paper                     | <i>A. chinensis</i> 'Hongyang' | China, Sichuan, Shifang             | 2012 | 850.1.1. CC822         | 325     | 45,191 |
| C11             | This paper                     | <i>A. chinensis</i> 'Hongyang' | China, Sichuan, Shifang             | 2012 | 850.2.2. CC823         | 335     | 50,545 |
| C12             | This paper                     | <i>A. chinensis</i> 'Hongyang' | China, Sichuan, Shifang             | 2012 | 850.4.1. CC826         | 339     | 48,835 |
| C13             | This paper                     | <i>A. chinensis</i> 'Hongyang' | China, Sichuan, Shifang             | 2012 | 850.5.1. CC827         | 326     | 44,835 |
| C14             | This paper                     | <i>A. chinensis</i> 'Hongyang' | China, Sichuan, Shifang             | 2012 | 850.6.1. CC828         | 326     | 44,683 |
| C15             | This paper                     | <i>A. chinensis</i> 'Hort16A'  | China, Sichuan, Pengzhou, Cifeng    | 2012 | 913.1.1. CC835         | 327     | 54,039 |
| C16             | This paper                     | <i>A. chinensis</i> 'Hongyang' | China, Hubei, Enshi, Jianshi        | 2012 | 913.5.1, CC836         | 386     | 42,362 |
| C17             | This paper                     | <i>A. chinensis</i> 'Hongyang' | China, Sichuan, Qionglai, Huojing   | 2012 | 913.10.1, CC837        | 366     | 43,680 |
| C18             | This paper                     | <i>Actinidia</i> sp.           | China, Shaanxi, Baoji, Meixian      | 2012 | 913.15.1, CC838        | 325     | 50,834 |
| C24             | This paper                     | <i>A. chinensis</i> 'Hongyang' | China, Chongqing, Wanzhou, Houshan  | 2014 | 120L3                  | 338     | 48,742 |
| C26             | This paper                     | <i>A. chinensis</i> 'Hongyang' | China, Chongqing, Wanzhou, Houshan  | 2014 | 124L1                  | 343     | 47,302 |
| C27             | This paper                     | <i>A. chinensis</i> 'Hongyang' | China, Chongqing, Wanzhou, Houshan  | 2014 | 124L7                  | 364     | 48,757 |
| C28             | This paper                     | <i>A. chinensis</i> 'Hongyang' | China, Sichuan, Dujiangyan, Xujia   | 2014 | 139S2                  | 343     | 46,114 |
| C29             | This paper                     | <i>A. deliciosa</i> 'Hayward'  | China, Sichuan, Dujiangyan, Hongkou | 2014 | 163S1                  | 321     | 41,599 |
| C30             | This paper                     | <i>A. chinensis</i>            | China, Sichuan, Dujiangyan, Hongkou | 2014 | 165L4                  | 334     | 43,004 |
| C31             | This paper                     | <i>A. chinensis</i>            | China, Sichuan, Dujiangyan, Hongkou | 2014 | 166L2                  | 303     | 43,291 |
| C48             | This paper                     | <i>A. chinensis</i>            | China, Hunan, Changde City, Shimen  | 2014 | 50L1                   | 351     | 47,058 |
| C54             | This paper                     | <i>A. deliciosa</i>            | China, Guizhou, Liupanshui, Panxian | 2014 | 77L5                   | 360     | 47,421 |
| C62             | This paper                     | <i>A. chinensis</i> 'Jinyan'   | China, Guizhou, Liupanshui, Liuzhi  | 2014 | GZ410                  | 327     | 45,829 |
| C66             | This paper                     | <i>A. chinensis</i> 'Hongyang' | China, Hubei, Yichang, Yiling       | 2014 | YC5                    | 333     | 48,710 |

|                  |                                 |                                |                                     |      |                           |      |        |
|------------------|---------------------------------|--------------------------------|-------------------------------------|------|---------------------------|------|--------|
| C67              | This paper                      | <i>A. chinensis</i> 'Hongyang' | China, Chongqing, Qianjiang, Jinxi  | 2012 | 163W4                     | 310  | 46,111 |
| C68              | This paper                      | <i>A. chinensis</i> 'Jinyan'   | China, Guizhou, Liupanshui, Liuzhi  | 2014 | GZ3-5                     | 347  | 45,058 |
| C69              | This paper                      | <i>A. chinensis</i> 'Jinyan'   | China, Shaanxi, Xi'an, Zhouzhi      | 2014 | SH1-14                    | 304  | 47,863 |
| C70              | This paper                      | <i>A. chinensis</i>            | China, Sichuan, Dujiangyan, Xujia   | 2014 | 141S5                     | 327  | 48,715 |
| C73              | This paper                      | <i>A. chinensis</i> 'Hongyang' | China, Sichuan, Dujiangyan, Xujia   | 2014 | 139L10                    | 365  | 48,937 |
| C74              | This paper                      | <i>A. chinensis</i> 'Hongyang' | China, Sichuan, Dujiangyan, Xiangge | 2014 | 148L1                     | 326  | 47,058 |
| C75              | This paper                      | <i>A. chinensis</i> 'Hongyang' | China, Sichuan, Dujiangyan, Xiangge | 2014 | 148L4                     | 336  | 47,058 |
| CL4 <sup>1</sup> | Butler <i>et al.</i> (2013)     | <i>A. deliciosa</i>            | Chile, Maule                        | 2010 |                           | 370  | 37,470 |
| I1 <sup>1</sup>  | Marceletti <i>et al.</i> (2011) | <i>A. deliciosa</i> 'Hayward'  | Italy, Roma                         | 1992 | NCPB3871                  | 405  | 27,730 |
| I2 <sup>1</sup>  | Marceletti <i>et al.</i> (2011) | <i>A. chinensis</i> 'Hort16A'  | Italy, Latina                       | 2008 | CRAFRU8.43                | 523  | 22,372 |
| I3 <sup>1</sup>  | Mazzaglia <i>et al.</i> (2012)  | <i>A. chinensis</i> 'Hort16A'  | Italy, Lazio                        | 2008 | CFBP 7286                 | 329  | 31,420 |
| I10 <sup>1</sup> | Butler <i>et al.</i> (2013)     | <i>A. deliciosa</i>            | Italy, Roma                         | 2010 | ICMP18744,<br>CRAFRU11.41 | 358  | 35,904 |
| I11              | Mazzaglia <i>et al.</i> (2012)  | <i>A. chinensis</i> 'Jin Tao'  | Italy, Veneto                       | 2008 | CFBP 7285                 | 359  | 33,568 |
| I13              | Mazzaglia <i>et al.</i> (2012)  | <i>A. deliciosa</i> 'Hayward'  | Italy, Lazio                        | 2008 | CFBP 7287                 | 357  | 36,668 |
| J1 <sup>1</sup>  | Baltrus <i>et al.</i> (2011)    | <i>A. deliciosa</i>            | Japan, Kanagawa                     | 1984 | MAFF 302091               | 248  | 65,551 |
| J2 <sup>1</sup>  | Mazzaglia <i>et al.</i> (2012)  | <i>A. chinensis</i>            | Japan                               | 1988 | PA459                     | 634  | 17,643 |
| J25 <sup>1</sup> | Mazzaglia <i>et al.</i> (2012)  | <i>A. deliciosa</i> 'Hayward'  | Japan, Shizuoka                     | 1984 | KW41                      | 570  | 18,393 |
| J29              | McCann <i>et al.</i> (2013)     | <i>A. arguta</i>               | Japan, Kanagawa                     | 1987 | MAFF302133, JpSar1        | 412  | 30,107 |
| J30              | McCann <i>et al.</i> (2013)     | <i>A. arguta</i>               | Japan, Kanagawa                     | 1987 | MAFF302134, JpSar2        | 401  | 32,586 |
| J31              | McCann <i>et al.</i> (2013)     | <i>A. deliciosa</i> 'Hayward'  | Japan, Kanagawa                     | 1987 | MAFF302143, JpKiw4        | 1723 | 4,505  |
| J32              | McCann <i>et al.</i> (2013)     | <i>A. deliciosa</i> 'Hayward'  | Japan, Wakayama                     | 1988 | MAFF302145, JpWa1         | 465  | 33,908 |
| J33              | McCann <i>et al.</i> (2013)     | <i>A. deliciosa</i> 'Hayward'  | Japan, Wakayama                     | 1988 | MAFF302146, JpWa2         | 410  | 31,305 |
| J35              | McCann <i>et al.</i> (2013)     | <i>A. deliciosa</i> 'Hayward'  | Japan, Shizuoka                     | 1984 | NCPB 3739, Kw11           | 368  | 39,207 |
| J36 <sup>1</sup> | Butler <i>et al.</i> (2013)     | <i>A. deliciosa</i> 'Hayward'  | Japan, Shizuoka                     | 1984 | Kw1                       | 417  | 27,018 |
| J37 <sup>1</sup> | Fujikawa & Sawada (2015)        |                                | Japan, Saga                         | 2014 | PRJDB2950                 | 291  | 50,639 |
| J38              | This paper                      | <i>A. chinensis</i> 'Hort16A'  | Japan                               | 2014 |                           | 313  | 48,009 |

|                   |                                |                               |                              |      |           |      |        |
|-------------------|--------------------------------|-------------------------------|------------------------------|------|-----------|------|--------|
| J39 <sup>2</sup>  | This paper                     | <i>A. chinensis</i> 'Hort16A' | Japan, Saga                  | 2014 |           | 1221 | 9,308  |
| K3                | Mazzaglia <i>et al.</i> (2012) | <i>A. deliciosa</i>           | Korea, Jeonnam               | 1997 | KN.2      | 962  | 10,103 |
| K4                | This paper                     | <i>A. chinensis</i> 'Hort16A' | Korea                        | 2014 |           | 258  | 46,118 |
| K5                | This paper                     | <i>A. chinensis</i> 'Hort16A' | Korea, Jeju                  | 2014 |           | 313  | 46,355 |
| K6                | This paper                     | <i>A. chinensis</i> 'Hort16A' | Korea                        | 2011 |           | 270  | 43,774 |
| K7                | This paper                     | <i>A. chinensis</i> 'Hort16A' | Korea                        | 2014 |           | 330  | 46,153 |
| K26               | McCann <i>et al.</i> (2013)    | <i>A. chinensis</i>           | Korea, Jeonnam               | 1997 | KACC10584 | 290  | 36,930 |
| K27               | McCann <i>et al.</i> (2013)    | <i>A. chinensis</i>           | Korea, Jeonnam               | 1998 | KACC10594 | 413  | 25,076 |
| K28               | McCann <i>et al.</i> (2013)    | <i>A. chinensis</i>           | Korea, Jeonnam               | 1997 | KACC10574 | 297  | 37,347 |
| NZ13              | McCann <i>et al.</i> (2013)    | <i>A. deliciosa</i> 'Hayward' | New Zealand, Te Puke         | 2010 |           | 1    |        |
| NZ31 <sup>1</sup> | Butler <i>et al.</i> (2013)    | <i>A. deliciosa</i>           | New Zealand, Paengaroa       | 2010 |           | 382  | 33,149 |
| NZ32 <sup>1</sup> | Butler <i>et al.</i> (2013)    | <i>A. chinensis</i>           | New Zealand, Te Puke         | 2010 |           | 367  | 31,162 |
| NZ33 <sup>1</sup> | Butler <i>et al.</i> (2013)    |                               | New Zealand, Te Puke         | 2011 | TP1       | 380  | 31,549 |
| NZ34 <sup>1</sup> | Butler <i>et al.</i> (2013)    |                               | New Zealand, Te Puke         | 2011 | 6.1       | 386  | 46,155 |
| NZ35              | This paper                     | <i>Actinidia</i> sp.          | New Zealand, Te Puke         | 2010 |           | 330  | 47,026 |
| NZ37              | This paper                     | <i>Actinidia</i> sp.          | New Zealand, Te Puke         | 2010 | BF        | 317  | 46,211 |
| NZ38              | This paper                     | <i>A. deliciosa</i>           | New Zealand, Te Puke         | 2014 | 627       | 322  | 46,155 |
| NZ39              | This paper                     | <i>A. deliciosa</i>           | New Zealand, Te Puke         | 2014 | 670       | 315  | 46,155 |
| NZ40              | This paper                     | <i>A. deliciosa</i>           | New Zealand, Te Puke         | 2014 | 793       | 322  | 45,201 |
| NZ41              | This paper                     | <i>A. deliciosa</i>           | New Zealand, Te Puke         | 2014 | 854.2     | 322  | 46,356 |
| NZ42              | This paper                     | <i>A. deliciosa</i>           | New Zealand, Te Puke         | 2014 | 632.1     | 322  | 48,669 |
| NZ43              | This paper                     | <i>A. deliciosa</i>           | New Zealand, Te Puke         | 2014 | 694.1     | 322  | 44,416 |
| NZ45              | This paper                     | <i>A. deliciosa</i>           | New Zealand, Te Puke         | 2014 | 1014      | 364  | 48,150 |
| NZ46              | This paper                     | <i>A. chinensis</i>           | New Zealand, Matakana Island | 2012 |           | 325  | 48,671 |
| NZ47              | This paper                     |                               | New Zealand, Te Puke         | 2014 | 851       | 320  | 46,212 |
| NZ48              | This paper                     | <i>A. chinensis</i> 'Hort16A' | New Zealand, Te Puke         | 2013 | 821       | 320  | 48,955 |

556  
557

|      |                                |                              |                       |      |     |     |        |
|------|--------------------------------|------------------------------|-----------------------|------|-----|-----|--------|
| NZ49 | This paper                     |                              | New Zealand, Te Puke  | 2011 | 691 | 325 | 46,155 |
| NZ54 | This paper                     | <i>A. chinensis</i>          | New Zealand, Pukekohe | 2014 |     | 323 | 48,754 |
| NZ59 | This paper                     |                              | New Zealand           | 2015 |     | 315 | 44,129 |
| NZ60 | This paper                     |                              | New Zealand           | 2015 |     | 332 | 38,090 |
| P1   | Mazzaglia <i>et al.</i> (2012) | <i>A. deliciosa</i> 'Summer' | Portugal              | 2010 | 346 | 354 | 31,352 |

<sup>1</sup>Simulated reads were generated from contigs available for these previously sequenced genomes

<sup>2</sup>Different sequencing runs were employed for draft genome assembly and variant calling

558

559 **Table S2. Average percent identity within and between Psa lineages**

560

| Lineage      | <i>Psa-1</i> | <i>Psa-2</i> | <i>Psa-3</i> | <i>Psa-5</i>    |
|--------------|--------------|--------------|--------------|-----------------|
| <i>Psa-1</i> | 99.70        |              |              |                 |
| <i>Psa-2</i> | 98.97        | 99.76        |              |                 |
| <i>Psa-3</i> | 99.06        | 98.91        | 99.73        |                 |
| <i>Psa-5</i> | 98.87        | 98.96        | 98.83        | ND <sup>1</sup> |

561

562

563

564

565

566

567

<sup>1</sup>Not determined for *Psa-5* as only a single strain has been sequenced from this lineage. ANIb values determined using representative strains for *Psa-1* (J31, K3, J2, J1, J30, J29, J35, J32, J33, I1, J36, J25), *Psa-2* (K27, K6, K4, K26, K28), *Psa-3* (C16, C17, C10, C11, C70, K7, C15, C54, C74, C69, K5, C62, I13, NZ13) and *Psa-5* (J37)

568 **Table S3. SNPs shared between all pandemic NZ and Japanese isolates**

569

| Protein ID (NZ13) | Product                                               | Codon          |
|-------------------|-------------------------------------------------------|----------------|
| AKT31947.1        | ion channel protein Tsx                               | 71 (silent)    |
| AKT32845.1        | bifunctional glutamine-synthetase adenylyltransferase | W977R          |
| AKT30494.1        | chromosome segregation protein SMC                    | H694Q          |
| AKT29651.1        | cytidylate kinase                                     | V173L          |
| AKT32264.1        | peptidase PmbA                                        | M418K          |
| Intergenic        |                                                       | 362,522 (G->T) |

570  
571

**Table S4. Isolates identified by cultivation and disease status of host**

|                         | <i>A. arguta</i> | <i>A. callosa</i> | <i>A. chinensis</i> var. <i>chinensis</i> | <i>A. chinensis</i> var. <i>deliciosa</i> | <i>Actinidia</i> sp. | <i>Camellia</i> sp. | <i>Prunus</i> sp. | Total |
|-------------------------|------------------|-------------------|-------------------------------------------|-------------------------------------------|----------------------|---------------------|-------------------|-------|
| <b>Cultivated</b>       | 3                |                   | 373                                       | 350                                       | 1                    | 45                  | 45                | 817   |
| <b>Disease</b>          | 3                |                   | 323                                       | 244                                       |                      | 30                  | 45                | 645   |
| Not determined          | 2                |                   | 121                                       | 81                                        |                      | 20                  | 10                | 234   |
| <i>Pseudomonas</i> spp. | 1                |                   | 123                                       | 120                                       |                      | 8                   | 35                | 287   |
| <i>P. syringae</i>      |                  |                   | 12                                        | 23                                        |                      | 2                   |                   | 37    |
| <i>Psa</i>              |                  |                   | 67                                        | 20                                        |                      |                     |                   | 87    |
| <b>Healthy</b>          |                  |                   | 27                                        | 44                                        |                      | 1                   |                   | 72    |
| Not determined          |                  |                   | 10                                        | 16                                        |                      | 1                   |                   | 27    |
| <i>Pseudomonas</i> spp. |                  |                   | 17                                        | 28                                        |                      |                     |                   | 45    |
| <i>P. syringae</i>      |                  |                   |                                           |                                           |                      |                     |                   | 0     |
| <i>Psa</i>              |                  |                   |                                           |                                           |                      |                     |                   | 0     |
| <b>Suspected</b>        |                  |                   | 17                                        | 62                                        |                      | 14                  |                   | 93    |
| Not determined          |                  |                   | 9                                         | 27                                        |                      | 1                   |                   | 37    |
| <i>Pseudomonas</i> spp. |                  |                   | 7                                         | 31                                        |                      | 12                  |                   | 50    |
| <i>P. syringae</i>      |                  |                   | 1                                         | 4                                         |                      | 1                   |                   | 6     |
| <i>Psa</i>              |                  |                   |                                           |                                           |                      |                     |                   | 0     |
| <b>Wild</b>             | 38               | 15                | 157                                       | 230                                       |                      | 21                  |                   | 461   |
| <b>Disease</b>          | 14               |                   | 3                                         |                                           |                      |                     |                   | 17    |
| Not determined          | 2                |                   | 1                                         |                                           |                      |                     |                   | 3     |
| <i>Pseudomonas</i> spp. | 11               |                   | 2                                         |                                           |                      |                     |                   | 13    |
| <i>P. syringae</i>      | 1                |                   |                                           |                                           |                      |                     |                   | 1     |
| <i>Psa</i>              |                  |                   |                                           |                                           |                      |                     |                   | 0     |
| <b>Healthy</b>          | 10               | 15                | 62                                        | 214                                       |                      | 21                  |                   | 322   |
| Not determined          | 3                | 3                 | 33                                        | 121                                       |                      | 16                  |                   | 176   |
| <i>Pseudomonas</i> spp. |                  | 12                | 15                                        | 81                                        |                      | 4                   |                   | 112   |

572  
573  
574

|                         |    |    |     |  |     |   |    |    |      |
|-------------------------|----|----|-----|--|-----|---|----|----|------|
| <i>P. syringae</i>      | 7  |    | 14  |  | 12  |   | 1  |    | 34   |
| <i>Psa</i>              |    |    |     |  |     |   |    |    | 0    |
| <b>Suspected</b>        | 14 |    | 92  |  | 16  |   |    |    | 122  |
| Not determined          | 4  |    | 33  |  | 11  |   |    |    | 48   |
| <i>Pseudomonas</i> spp. | 10 |    | 42  |  | 5   |   |    |    | 57   |
| <i>P. syringae</i>      |    |    | 17  |  |     |   |    |    | 17   |
| <i>Psa</i>              |    |    |     |  |     |   |    |    | 0    |
| <b>Total</b>            | 41 | 15 | 530 |  | 580 | 1 | 66 | 45 | 1278 |



575 **FIGURES**

576 **Figure 1. Phylogeny of *Psa***

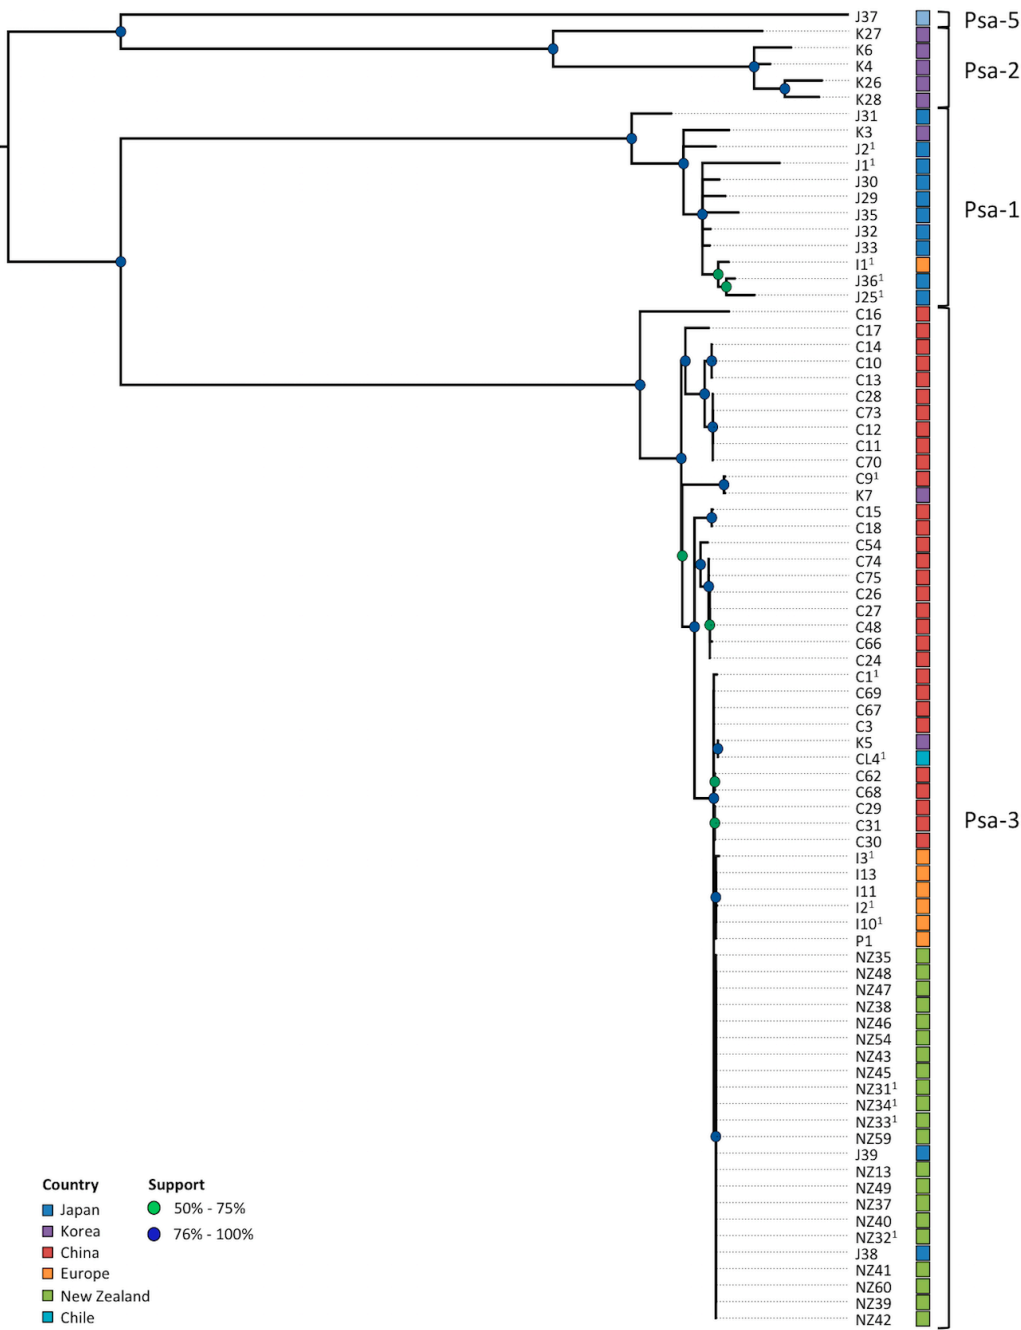

577

578

**Figure 2. Phylogeny of *Psa-3***

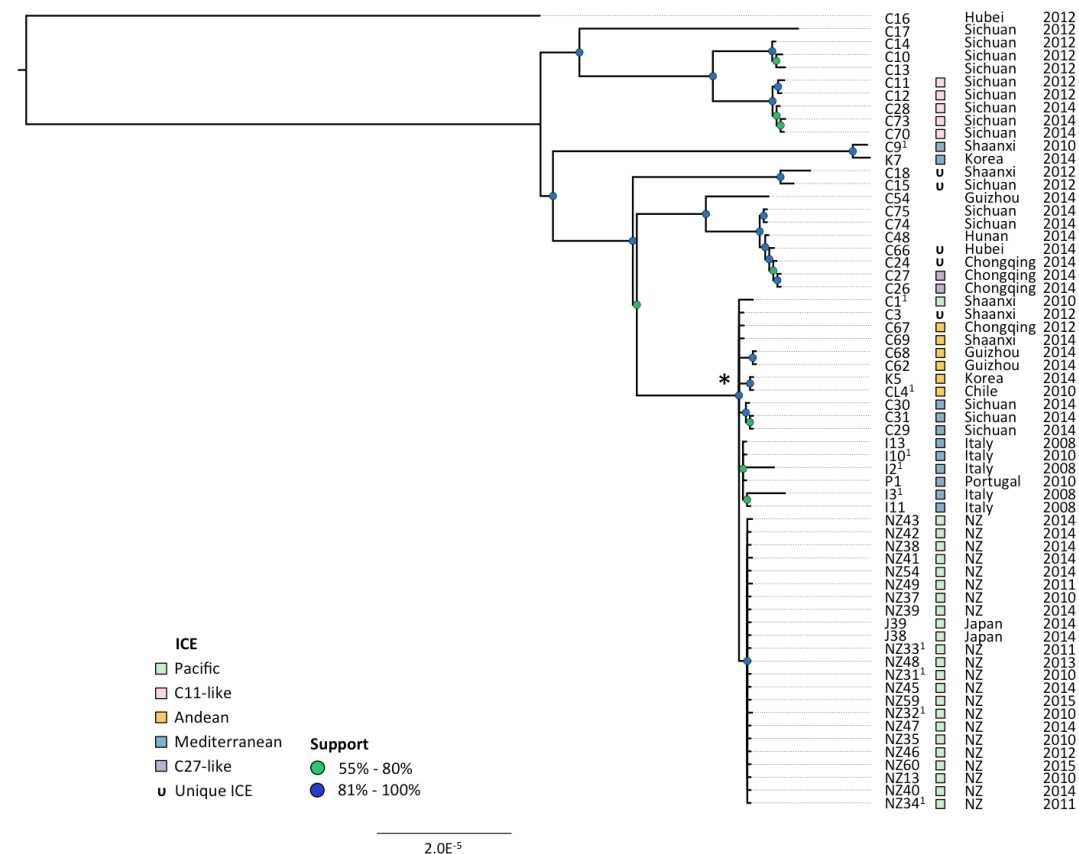

**Figure 3. *Psa* isolation locations in East Asia**

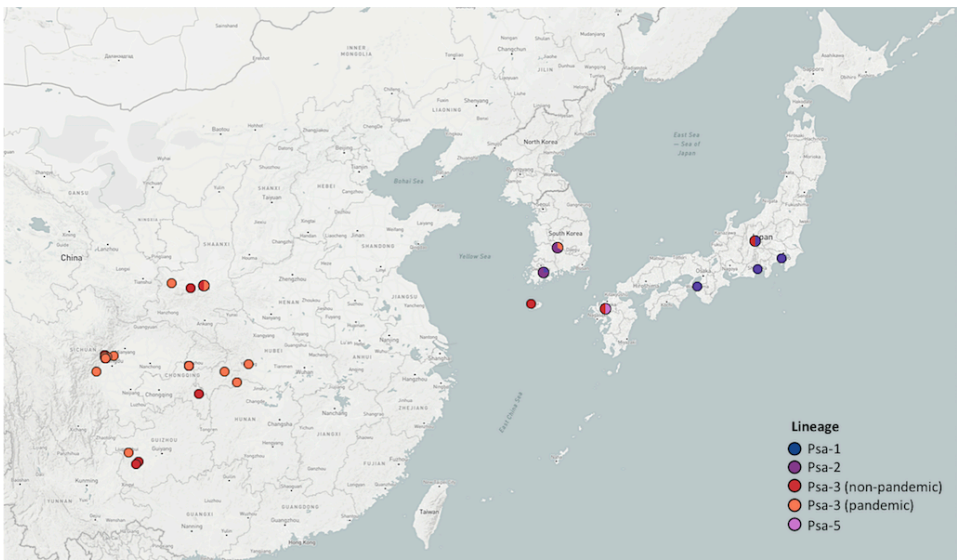

# **Figure 4. Genomic context of polymorphisms in *Psa-3***

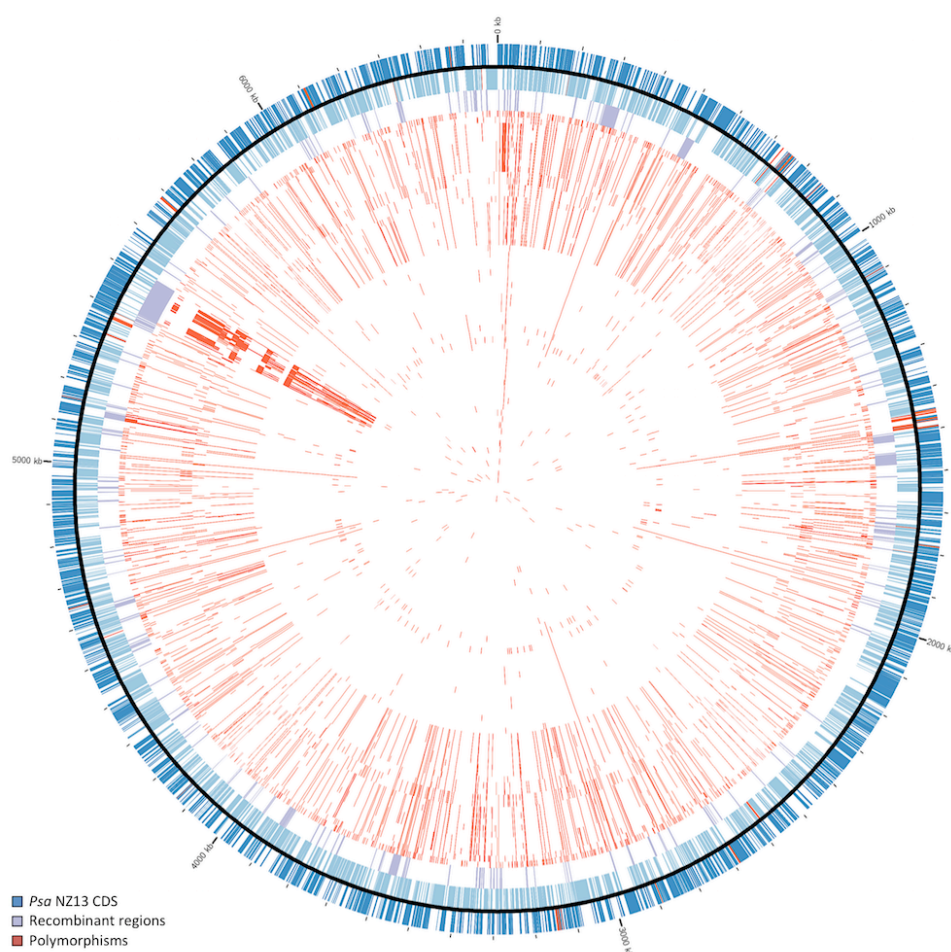

**Figure 5. Pangenome of *Psa-3***

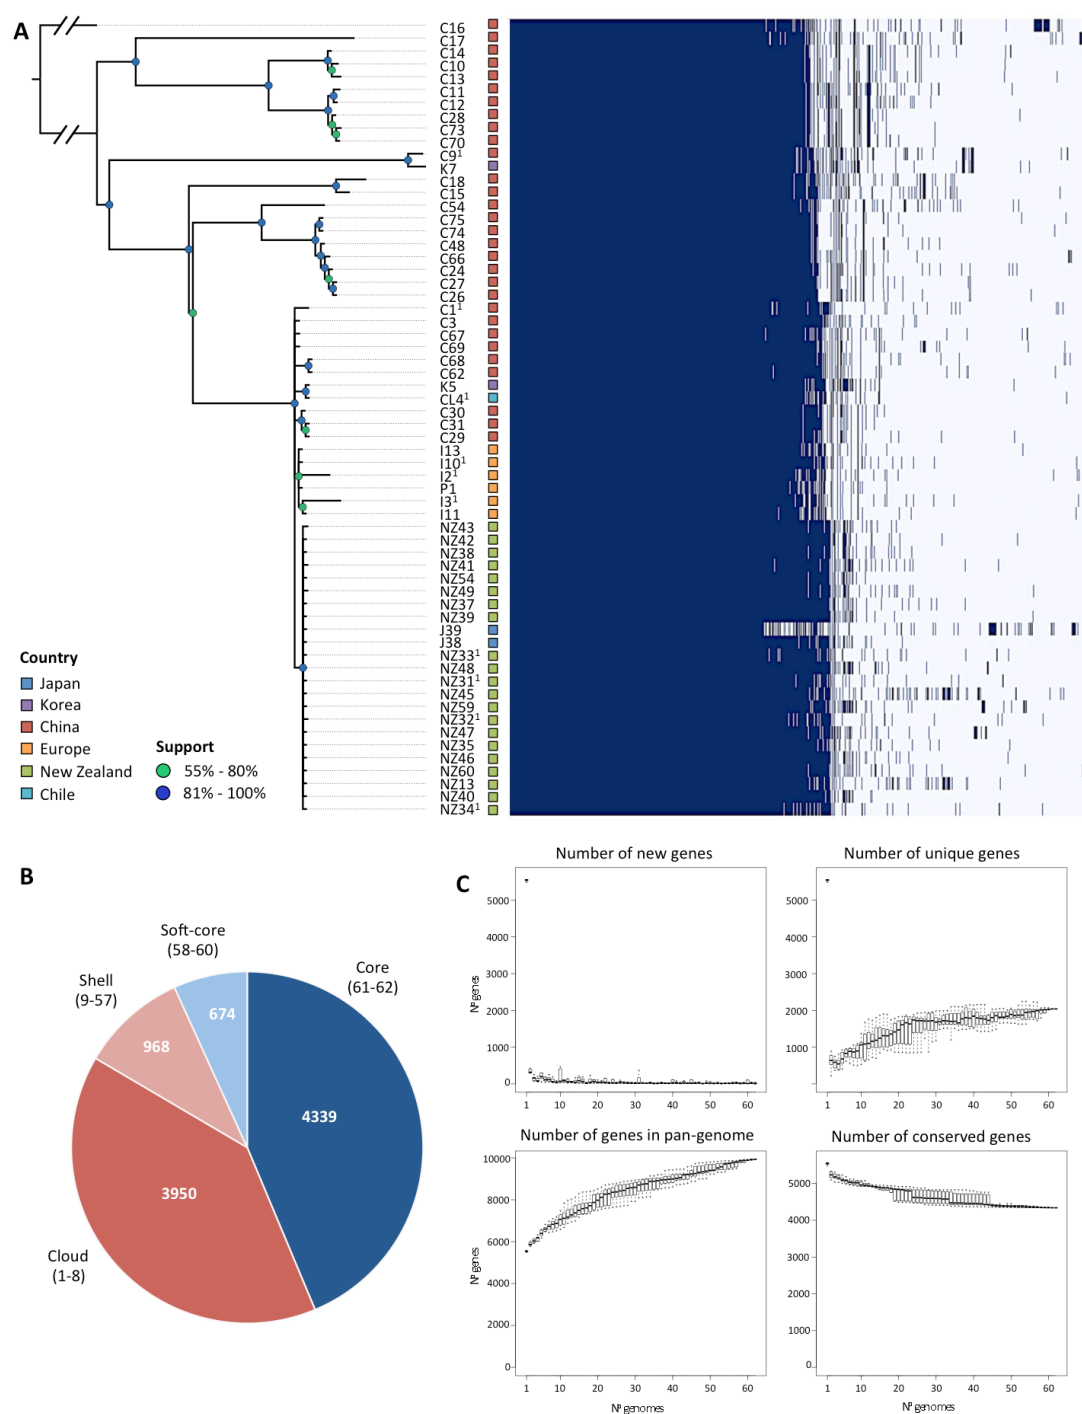

**Figure S1. Bacterial growth assay of *Psa* on *A. chinensis***

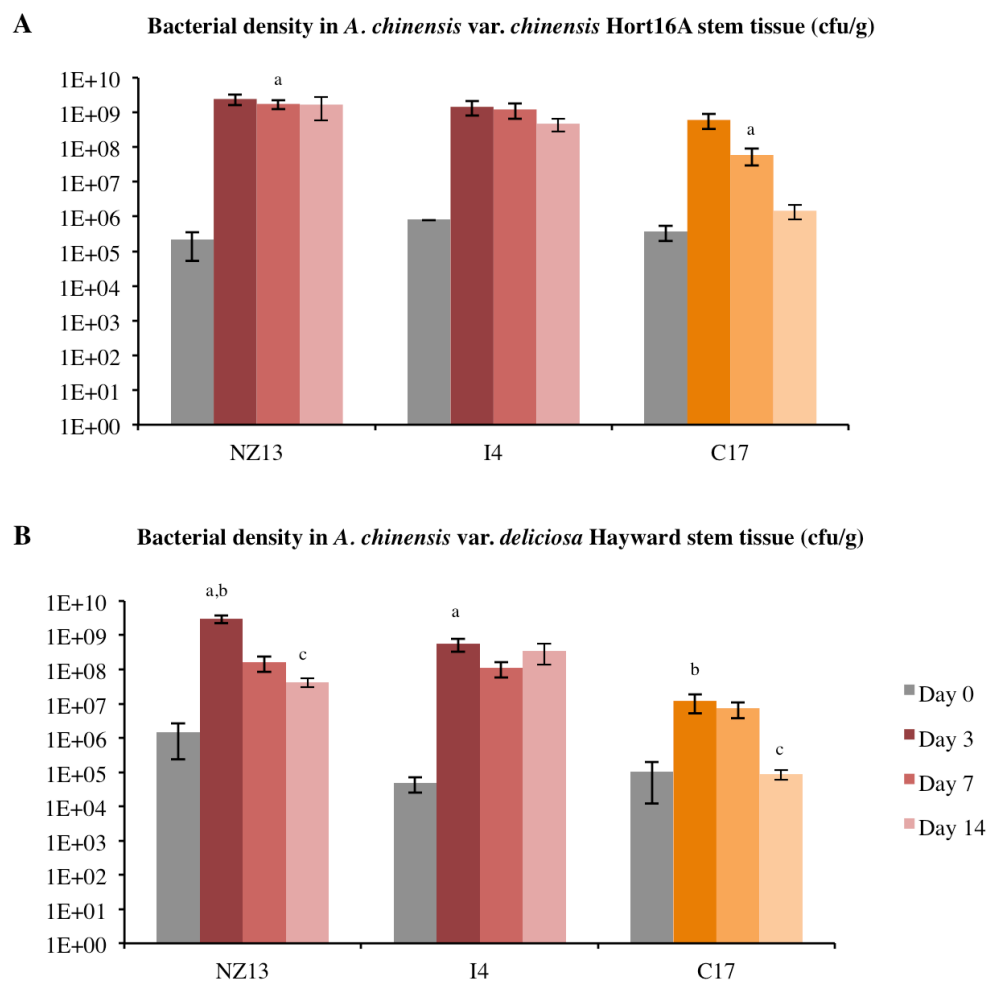

**Figure S2. Wss operon disruption in *Psa-3***

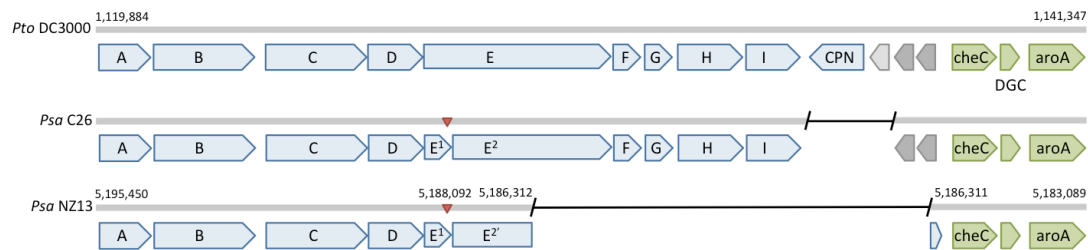

## FIGURE LEGENDS

### Figure 1. Phylogeny of *Psa*

RaxML Maximum likelihood tree based on 1,059,722bp non-recombinant core genome alignment including 2,953 variant sites. All nodes displayed have bootstrap support values above 50% (50-75% in green, 76-100% in blue). Province of isolation is displayed for Chinese isolates.

### Figure 2. Phylogeny of *Psa-3*

Maximum likelihood tree based on 4,853,155bp non-recombinant core genome alignment including 1,948 variant sites. All nodes displayed have bootstrap support values above 55% (55-80% in green, 81-100% in blue). Year and province (China) or country of isolation is displayed. Integrative and conjugative elements (ICEs) present in each host genome are indicated.

### Figure 3. *Psa* isolation locations in East Asia

Filled circles' positions correspond to location of isolation (select Japanese and Korean isolates do not have reliable isolation location information). Colour corresponds to the phylogenetic position of the isolates as shown in Figure S1. Map generated in Microreact.

### Figure 4. Genomic context of polymorphisms in *Psa-3*

Polymorphisms and recombinant regions mapped onto *Psa* NZ13 reference genome using CIRCOS (64). *Psa* NZ13 CDS are displayed in the first and second ring (blue), with annotated Type 3 secretion system and effectors highlighted (red). Inner rings

display polymorphisms in *Psa*-3 genomes ordered from most to least divergent relative to *Psa* NZ13 (see Figure 2). The most polymorphic region corresponds to the location of the integrative and conjugative element (ICE) in *Psa* NZ13.

### **Figure 5. Pangenome of *Psa*-3**

A. Presence/absence matrix of all core and accessory genes in *Psa*-3, ordered according to strains' phylogenetic relationships. Country of isolation is indicated at left. B. The core and flexible genome of *Psa*-3. The core, soft-core, shell and cloud genomes are defined according to the numbers in parentheses. C. Number of new, unique and conserved genes with addition of each genome.

### **Figure S1. Bacterial growth assay on *A. deliciosa***

Bacterial growth of pandemic *Psa* NZ13, I4 (red) and divergent C17 (orange) strains on *A. chinensis* var. *chinensis* 'Hort16A' and *A. chinensis* var. *deliciosa* 'Hayward'. Mean *in planta* bacterial density in stem tissue (cfu/g) at 0, 3 and 7 days post-inoculation is shown (mean  $\pm$  SEM) with superscript denoting significant difference between strains at each sampling time ( $P < 0.05$ , two-tailed t-test, unequal variance). Four replicate plants were assayed at day 0, and six replicates at each subsequent time point.

### **Figure S2. Wss operon disruption in *Psa*-3**

Genes encoding components of the *wss* operon (blue), hypothetical and conserved hypothetical (light and dark grey), chemotaxis, diguanylate cyclase and *aroA* (green). Deletions (black line) and position of single base pair insertion (red triangle)



648 displayed with reference to *Pto* DC3000. Insertion results in frameshift mutation in  
649 *wssE*, two predicted derivatives annotated as *wssE1* and *wssE2*. The subsequent 6.5kb  
650 deletion in the ancestor of the pandemic subclade results in the truncation of *wssE2*,  
651 annotated as *wssE2'*.

## 652 REFERENCES

- 653 1. Everett KR, *et al.* (2011) First report of *Pseudomonas syringae* pv. *actinidiae*  
654 causing kiwifruit bacterial canker in New Zealand. *Australasian Plant Disease*  
655 *Notes* 6(1):67–71.
- 656 2. Vanneste JL, *et al.* (2011) First Report of *Pseudomonas syringae* pv.  
657 *actinidiae*, the Causal Agent of Bacterial Canker of Kiwifruit in France. *Plant*  
658 *Disease* 95(10):1311–1311.
- 659 3. Balestra GM, Renzi M, Mazzaglia A (2010) First report of bacterial canker of  
660 *Actinidia deliciosa* caused by *Pseudomonas syringae* pv. *actinidiae* in Portugal.  
661 *New Disease Reports* 22: 10.
- 662 4. Abelleira A, *et al.* (2011) First Report of Bacterial Canker of Kiwifruit Caused  
663 by *Pseudomonas syringae* pv. *actinidiae* in Spain. *Plant Disease* 95(12):1583–  
664 1583.
- 665 5. Sawada H, *et al.* (2015) Characterization of biovar 3 strains of *Pseudomonas*  
666 *syringae* pv. *actinidiae* isolated in Japan. *Annals of the Phytopathological*  
667 *Society of Japan* 81(2):111–126.
- 668 6. Koh YJ, *et al.* (2012) Occurrence of a New Type of *Pseudomonas syringae* pv.  
669 *actinidiae* Strain of Bacterial Canker on Kiwifruit in Korea. *The Plant*  
670 *Pathology Journal* 28(4):423–427.
- 671 7. Zhao ZB, Gao XN, Huang QL, Huang LL, Qin HQ (2013) Identification and  
672 characterization of the causal agent of bacterial canker of kiwifruit in the  
673 Shaanxi province of China. *Journal of Plant Pathology* 95(1): 155-162.
- 674 8. Serizawa S, Ichikawa T, Takikawa Y, Tsuyumu S, Goto M (1989) Occurrence  
675 of bacterial canker of kiwifruit in Japan: Description of symptoms, isolation of  
676 the pathogen and screening of bactericides. *Annals of the Phytopathological*  
677 *Society of Japan* 55:427–436.
- 678 9. Koh YJ, Jung JS, Hur JS (2002) Current Status of Occurrence of Major  
679 Diseases on Kiwifruits and Their Control in Korea. *Acta Horticulturae* 610:  
680 437-443.
- 681 10. Ferguson AR, Huang H (2007) Genetic resources of kiwifruit: domestication  
682 and breeding. *Horticultural Reviews*, ed Janick J. (John Wiley & Sons,  
683 Hoboken), pp 1-121.
- 684 11. Ferguson AR (2011) Kiwifruit: Evolution of a crop. *ISHS Acta Horticulturae*:  
685 *VII International Symposium on Kiwifruit* 913 913:31–42.
- 686 12. Huang H, Wang Y, Zhang Z, Jiang Z, Wang S (2004) *Actinidia* germplasm  
687 resources and kiwifruit industry in China. *HortScience* 39(6):1165–1172.
- 688 13. Shim KK, Ha YM (1999) Kiwifruit production and research in Korea. *Acta*  
689 *Hortic* (498):127–132.

- 690 14. Testolin R, Ferguson AR (2009) Kiwifruit ( *Actinidia* spp.) production and  
691 marketing in Italy. *New Zealand Journal of Crop and Horticultural Science*  
692 37(1):1–32.
- 693 15. Ferguson AR (2015) Kiwifruit in the world. *Acta Hortic* (1096):33–46.
- 694 16. Cruzat C (2014) The kiwifruit in Chile and in the world. *Revista Brasileira de*  
695 *Fruticultura*. 36(1): 112-123.
- 696 17. Fang Y, Xiaoxiang Z, Tao WY (1990) Preliminary studies on kiwifruit disease  
697 in Hunan province. *Sichuan Fruit Science and Technology* 18:28–29.
- 698 18. Takikawa Y, Serizawa S, Ichikawa T, Tsuyumu S, Goto M (1989)  
699 *Pseudomonas syringae* pv. *actinidiae* pv. nov.: The causal bacterium of canker  
700 of kiwifruit in Japan. *Jpn J Phytopathol* 55(4):437–444.
- 701 19. Koh Y, Cha JB, Chung JH, Lee HD (1994) Outbreak and spread of bacterial  
702 canker in kiwifruit. *Korean Journal of Plant Pathology* 10:68–72.
- 703 20. European and Mediterranean Plant Protection Organization (2011) EPPO  
704 Reporting Service - Pests & Diseases. (March 1, 2011):1–21.
- 705 21. Marcelletti S, Ferrante P, Petriccione M, Firrao G, Scortichini M (2011)  
706 *Pseudomonas syringae* pv. *actinidiae* Draft Genomes Comparison Reveal  
707 Strain-Specific Features Involved in Adaptation and Virulence to *Actinidia*  
708 Species. *PLoS ONE* 6(11):e27297.
- 709 22. Butler MI, *et al.* (2013) *Pseudomonas syringae* pv. *actinidiae* from recent  
710 outbreaks of kiwifruit bacterial canker belong to different clones that originated  
711 in China. *PLoS ONE* 8(2):e57464.
- 712 23. McCann HC, *et al.* (2013) Genomic Analysis of the Kiwifruit Pathogen  
713 *Pseudomonas syringae* pv. *actinidiae* Provides Insight into the Origins of an  
714 Emergent Plant Disease. *PLoS Pathog* 9(7):e1003503.
- 715 24. Mazzaglia A, *et al.* (2012) *Pseudomonas syringae* pv. *actinidiae* (PSA) Isolates  
716 from Recent Bacterial Canker of Kiwifruit Outbreaks Belong to the Same  
717 Genetic Lineage. *PLoS ONE* 7(5):e36518.
- 718 25. Templeton MD, Warren BA, Andersen MT, Rikkerink EHA, Fineran PC  
719 (2015) Complete DNA Sequence of *Pseudomonas syringae* pv. *actinidiae*, the  
720 Causal Agent of Kiwifruit Canker Disease. *Genome Announcements*  
721 3(5):e01054–15.
- 722 26. Fujikawa T, Sawada H (2016) Genome analysis of the kiwifruit canker  
723 pathogen *Pseudomonas syringae* pv. *actinidiae* biovar 5. *Scientific Reports*  
724 6:21399–11.
- 725 27. Biek R, Pybus OG, Lloyd-Smith JO, Didelot X (2015) Measurably evolving  
726 pathogens in the genomic era. *Trends in Ecology & Evolution* 30(6):306–313.
- 727 28. Grad YH, Lipsitch M (2014) Epidemiologic data and pathogen genome

- 728 sequences: a powerful synergy for public health. *Genome Biol* 15(11):538.
- 729 29. Wu X, *et al.* (2014) Deciphering the Components That Coordinately Regulate  
730 Virulence Factors of the Soft Rot Pathogen *Dickeya dadantii*. *MPMI*  
731 27(10):1119–1131.
- 732 30. Page F, *et al.* (2001) Osmoregulated Periplasmic Glucan Synthesis Is Required  
733 for *Erwinia chrysanthemi* Pathogenicity. *Journal of Bacteriology*  
734 183(10):3134–3141.
- 735 31. Klosterman SJ, *et al.* (2011) Comparative Genomics Yields Insights into Niche  
736 Adaptation of Plant Vascular Wilt Pathogens. *PLoS Pathog* 7(7):e1002137–19.
- 737 32. Bontemps-Gallo S, *et al.* (2016) The opgC gene is required for OPGs  
738 succinylation and is osmoregulated through RcsCDB and EnvZ/OmpR in the  
739 phytopathogen *Dickeya dadantii*. *Nature Publishing Group*:1–14.
- 740 33. Spiers AJ, Kahn SG, Bohannon J, Travisano M, Rainey PB (2002) Adaptive  
741 divergence in experimental populations of *Pseudomonas fluorescens*. I.  
742 Genetic and phenotypic bases of wrinkly spreader fitness. *Genetics* 161(1):33–  
743 46.
- 744 34. Prada-Ramírez HA, *et al.* (2015) AmrZ regulates cellulose production in pv.  
745 tomato DC3000. *Molecular Microbiology* 99(5):960–977.
- 746 35. Gal M, Preston GM, Massey RC, Spiers AJ, Rainey PB (2003) Genes encoding  
747 a cellulosic polymer contribute toward the ecological success of *Pseudomonas*  
748 *fluorescens* SBW25 on plant surfaces. *Mol Ecol* 12(11):3109–3121.
- 749 36. Colombi E, *et al.* (2016) Evolution of copper resistance in the kiwifruit  
750 pathogen *Pseudomonas syringae* pv. *actinidiae* through acquisition of  
751 integrative conjugative elements and plasmids. *In review*.
- 752 37. Japanese Ministry of Agriculture, Forestry and Fisheries, Yokohama Plant  
753 Protection Station, Research Division (2016) Pest Risk Analysis Report on  
754 *Pseudomonas syringae* pv. *actinidiae*. 1–24.
- 755 38. Mather AE, Reid S, Maskell DJ, Parkhill J (2013) Distinguishable epidemics of  
756 multidrug-resistant *Salmonella* Typhimurium DT104 in different hosts. *Science*  
757 341(6153):1514–7.
- 758 39. Wagner DM, *et al.* (2014) *Yersinia pestis* and the Plague of Justinian 541–543  
759 AD: a genomic analysis. *The Lancet Infectious Diseases* 14(4):319–326.
- 760 40. Andam CP, Worby CJ, Chang Q, Campana MG (2016) Microbial Genomics of  
761 Ancient Plagues and Outbreaks. *TRENDS in Microbiology*:1–13.
- 762 41. Cauchemez S, *et al.* (2016) Unraveling the drivers of MERS-CoV  
763 transmission. *Proc Natl Acad Sci USA* 113(32):9081–9086.
- 764 42. Almeida RPP, Nunney L (2015) How Do Plant Diseases Caused by *Xylella*  
765 *fastidiosa* Emerge? *Plant Disease* 99(11):1457–1467.

- 766 43. Schwartz AR, *et al.* (2015) Phylogenomics of *Xanthomonas* field strains  
767 infecting pepper and tomato reveals diversity in effector repertoires and  
768 identifies determinants of host specificity. *Front Microbiol* 6:208–17.
- 769 44. Clarke CR, *et al.* (2015) Genome-Enabled Phylogeographic Investigation of  
770 the Quarantine Pathogen *Ralstonia solanacearum* Race 3 Biovar 2 and  
771 Screening for Sources of Resistance Against Its Core Effectors.  
772 *Phytopathology* 105(5):597–607.
- 773 45. Vinatzer BA, Monteil CL, Clarke CR (2014) Harnessing Population Genomics  
774 to Understand How Bacterial Pathogens Emerge, Adapt to Crop Hosts, and  
775 Disseminate. *Annu Rev Phytopathol* 52(1):19–43.
- 776 46. Stukenbrock EH, Bataillon T (2012) A Population Genomics Perspective on  
777 the Emergence and Adaptation of New Plant Pathogens in Agro-Ecosystems.  
778 *PLoS Pathog* 8(9):e1002893.
- 779 47. Shapiro LR, *et al.* (2016) Horizontal Gene Acquisitions, Mobile Element  
780 Proliferation, and Genome Decay in the Host-Restricted Plant Pathogen  
781 *Erwinia Tracheiphila*. *Genome Biology and Evolution* 8(3):649–664.
- 782 48. Quibod IL, *et al.* (2016) Effector Diversification Contributes to *Xanthomonas*  
783 *oryzae* pv. *oryzae* Phenotypic Adaptation in a Semi-Isolated Environment.  
784 *Scientific Reports* 6:34137.
- 785 49. Singh RP, *et al.* (2011) The emergence of Ug99 races of the stem rust fungus is  
786 a threat to world wheat production. *Annu Rev Phytopathol* 49:465–481.
- 787 50. Monteil CL, Yahara K, Studholme DJ, Mageiros L (2016) Population-genomic  
788 insights into emergence, crop-adaptation, and dissemination of *Pseudomonas*  
789 *syringae* pathogens. *Microbial Genomics* 2(10). doi:10.1099/mgen.0.000089.
- 790 51. Sarkar SF, Guttman DS (2004) Evolution of the core genome of *Pseudomonas*  
791 *syringae*, a highly clonal, endemic plant pathogen. *Applied and Environmental*  
792 *Microbiology* 70(4):1999–2012.
- 793 52. Bankevich A, *et al.* (2012) SPAdes: A New Genome Assembly Algorithm and  
794 Its Applications to Single-Cell Sequencing. *Journal of Computational Biology*  
795 19(5):455–477.
- 796 53. Bolger AM, Lohse M, Usadel B (2014) Trimmomatic: a flexible trimmer for  
797 Illumina sequence data. *Bioinformatics* 30(15):btu170–2120.
- 798 54. Mukherjee S, Huntemann M, Ivanova N, Kyrpides NC, Pati A (2015) Large-  
799 scale contamination of microbial isolate genomes by Illumina PhiX control.  
800 *Standards in Genomic Sciences* 10(1):18.
- 801 55. Langmead B, Salzberg SL (2012) Fast gapped-read alignment with Bowtie 2.  
802 *Nat Meth* 9(4):357–359.
- 803 56. Li H (2011) A statistical framework for SNP calling, mutation discovery,  
804 association mapping and population genetical parameter estimation from

805 sequencing data. *Bioinformatics* 27(21):2987–2993.

806 57. Garrison E, Marth G (2012) Haplotype-based variant detection from short-read  
807 sequencing. *arXiv:1207.3907*.

808 58. Didelot X, Wilson DJ (2015) ClonalFrameML: Efficient Inference of  
809 Recombination in Whole Bacterial Genomes. *PLoS Computational Biology*  
810 11(2):e1004041–18.

811 59. Stamatakis A (2014) RAxML version 8: a tool for phylogenetic analysis and  
812 post-analysis of large phylogenies. *Bioinformatics* 30(9):1312–1313.

813 60. Richter M, Rosselo-Mora R, Glockner FO, Peplies J (2016) JSpeciesWS: a  
814 web server for prokaryotic species circumscription based on pairwise genome  
815 comparison. *Bioinformatics*:929–931.

816 61. Walker BJ, *et al.* (2014) Pilon: An Integrated Tool for Comprehensive  
817 Microbial Variant Detection and Genome Assembly Improvement. *PLoS ONE*  
818 9(11):e112963–14.

819 62. Seemann T (2014) Prokka: rapid prokaryotic genome annotation.  
820 *Bioinformatics* 30(14):2068–2069.

821 63. Page AJ, *et al.* (2015) Roary: rapid large-scale prokaryote pan genome  
822 analysis. *Bioinformatics* 31(22):3691–3693.

823 64. Krzywinski M, Schein J, Birol I, Connors J (2009) Circos: an information  
824 aesthetic for comparative genomics. *Genome Research* 19:1639–1635.

825
